# Supplementary material for: A Cyclist-Domain-Based Method for Evaluating the Level of Service of a Bicycle Lane
Source: Hindawi journal article supplement (doi:10.1155/2020/3524748), 2020-06-08
Supplement: f1 [file 3524748.f1.xlsx]

## Sheet: road 1
used to establish the relationship between velocity and space
cyclist	cycling distance / m	total time /s	mean speed /m/s	time	the cyclist aroud	angle	distance
1	14	5	2.8	4	1	0	4
					2	89	2
				5	1	-5	3.6
				6	1	-5	3.5
					2	90	0.8
					3	-40	2.4
				7	1	0	4
					2	90	1
				8	1	0	4.2
					2	88	1
					3	-85	2.2
				9	1	-2	4
					2	4	1.2
					3	-40	3
2	12	2.15	5.5814	5	1	30	3.6
					2	15	6.8
					3	0	8
					4	-90	1.6
				6	1	0	7
					2	30	3.6
				7	1	0	5
					2	80	4
3	16	3.12	5.12821	6	1	-5	5
					2	8	4
				7	1	-3	7
					2	32	3
				8	1	10	5.4
					2	88	2.4
				9	1	7	4.6
					2	-90	2
4	17	5.09	3.33988	7	1	0	2
					2	-40	2.6
					3	25	2.4
				8	1	4	2
					2	32	2.6
					3	-20	5
				9	1	5	2.4
					2	35	3
					3	-90	2
				10	1	45	2.4
					2	80	3.2
					3	-15	2
				11	1	0	4.2
					2	75	3
					3	85	3.8
5	16	3.02	5.29801	8	1	20	4.4
					2	55	3.6
					3	90	1.6
				9	1	45	4.4
					2	80	2.2
				10	1	90	2
					2	20	7
				11	1	10	5
					2	20	6.8
6	20	6.09	3.28407	8.14	1	0	3.6
					2	20	3
					3	-45	2.4
				9	1	0	3.8
					2	20	2.6
					3	-15	3.2
				10	1	-3	4
					2	20	2.6
				11	1	0	4.4
					2	40	2.6
					3	-85	2
					4	-32	3.6
				12	1	40	3.2
					2	-5	2.4
				13	1	0	5
					2	40	3.4
					3	-80	1.4
				14	1	30	4
					2	-20	4
				14.11	1	10	4
					2	-10	5
					3	-90	2
				15	1	10	4
					2	-30	2.8
7	16	3.06	5.22876	10	1	-5	4
					2	28	4
					3	90	14
				11	1	0	4
					2	15	4
					3	80	2
					4	-80	2
				12	1	10	4.8
					2	85	2.2
					3	-70	2.4
				13	1	0	4.4
					2	85	3.4
					3	-90	4.2
8	12	2	6	54	1	5	2.6
				55	1	45	1.6
					2	-90	2.4
					3	-20	3
				56	1	-85	2
9	14	4	3.5	0:11:07	1	3	2.2
					2	12	4
					3	45	2.4
				12:07	1	0	2
					2	30	2.4
					3	90	1.4
				13:07	1	7	2.4
					2	25	2.4
					3	55	2.8
					4	90	1.6
				14:07	1	-5	2.8
					2	42	3.4
					3	85	1.2
10	13.6	3	4.53333	0:12:05	1	-45	1.6
					2	-10	4.4
					3	30	2.8
				13:05	1	-45	1.6
					2	0	4.2
					3	40	2.4
				14:05	1	-32	1.2
					2	20	4.4
					3	30	2
				15:05	1	-32	1.2
					2	20	1.8
11	9.6	3.12	3.07692	0:13:20	1	45	1.4
					2	15	3
				14:20	1	15	2.6
					2	40	1.4
				15:20	1	40	1.2
					2	-90	2.4
				16:20	1	-30	2
					2	0	1.4
				17:11	1	-90	1.2
					2	0	1.6
12	16	4	4	0:15:01	1	-10	3
					2	0	6
					3	40	5
					4	62	3.2
				16:01	1	-8	2.6
					2	0	5.2
					3	30	4
					4	60	2.8
				17:01	1	-5	4.2
					2	0	4.8
					3	20	3.6
					4	70	2.6
				18:01	1	-90	3.2
					2	-45	2.2
					3	-5	2
					4	22	4
					5	45	2
				19:01:00	1	-90	2
					2	-30	2.8
					3	-5	2.4
					4	10	4
					5	30	1.6
13	12	4	3	0:19:00	1	20	1.6
					2	60	2.4
				20:00	1	20	1.4
					2	72	2
				21:00	1	20	1.4
					2	80	2
				22:00	1	20	1
					2	65	1.8
				23:00	1	0	1.4
					2	45	1.8

## Sheet: road 2
cyclist	cycling distance / m	total time /s	mean speed /m/s	time	the cyclist aroud	angle	distance
14	12.75	3.14	4.06051	00:00:59:07	1	3	3.3
					2	-31	3.5
					3	-80	1.5
				00:02:00:08	1	0	2.6
					2	23	3
					3	50	1.4
				00:02:01:07	1	0	2
					2	17	2.9
					3	35	1.2
15	13.5	3	4.5	00:01:59:01	1	-5	2.5
					2	30	3.7			r
					3	90	0.8
				00:02:00:01	1	-2	2
					2	37	2.7
				01:01:00	1	-2	1.7
					2	42	1.8
16	15	4.04	3.71287	2 days, 11:11:00	1	30	3.1
					2	46	4
				00:10:00	1	28	2.4
					2	70	3
				01:11:00	1	27	1.7
					2	88	2.3
					3	-90	2
				02:04:00	1	-70	1.5
					2	15	1.7
					3	90	2
17	9.45	4	2.3625	0:00:00	1	-30	1.8
					2	-10	2.8
					3	10	2.5
				0:01:00	1	-80	2.5
					2	-38	1.5
					3	-8	2.5
					4	8	2
				0:02:00	1	-90	1.1
					2	-45	1.5
					3	0	1.4
				00:03:00	1	-90	1
					2	-48	1.5
					3	5	1.3
18	14.4	3	4.8	00:02:00:12	1	-60	2.3
					2	-9	3.4
					3	0	5.4
					4	13	5.5
					5	35	2.5
				00:02:01:12	1	-40	2.6
					2	0	2.7
					3	30	4.1
					4	60	1.9
				00:02:02:12	1	-30	3.2
					2	0	2
					3	30	3.2
					4	88	1.7
19	15	3.9	3.84615	00:02:01:16	1	0	4.7
					2	15	6.2
					3	90	2.7
				00:02:02:16	1	0	3.5
					2	16	4.4
					3	90	2
				00:02:03:16	1	0	2.8
					2	24	3.1
20	15	5	3	00:02:02:20	1	-90	1.8
					2	-20	4.5
					3	8	4
				03:20	1	-30	1.7
					2	-15	4
					3	8	3
				04:20	1	-25	1.8
					2	8	3.7
					3	0	2.5
				05:20	1	-8	1.9
					2	5	2
				06:20	1	-5	2
					2	8	1.7
